# Supplementary material for: Effects of pH, Total Solids, Temperature and Storage Duration on Gas Emissions from Slurry Storage: A Systematic Review
Source: MDPI journal article supplement (doi:10.3390/atmos12091156), 2021-09-08
Supplement: s1 [file s1]

# Supplemental Material

## Effects of pH, Total Solids, Temperature and Storage Duration on Gas Emissions from Slurry Storage: A Systematic Review

Qingbo Qu <sup>1,2</sup> and Keqiang Zhang <sup>1,\*</sup>

<sup>1</sup> Agro-Environmental Protection Institute, Ministry of Agriculture and Rural Affairs, Tianjin 300191, China; qingbo.qu@wur.nl (Q.Q.); keqiangzhang68@163.com (K.Z.)

<sup>2</sup> Farming Systems Ecology, Wageningen University and Research, Wageningen 6700 AK, The Netherlands; qingbo.qu@wur.nl (Q.Q.)

\*Correspondence: keqiangzhang68@163.com

**Table S1.** Unit conversions of gas emissions data in selected literatures.

| Gas emissions <sup>1</sup>                    | Original units <sup>2</sup>                      | Unit conversions <sup>3</sup>                                                                                      |
|-----------------------------------------------|--------------------------------------------------|--------------------------------------------------------------------------------------------------------------------|
| NH <sub>3</sub> -N emissions, % of initial TN | mg NH <sub>3</sub> (kg raw manure) <sup>-1</sup> | × 14/17/initial TN content (% of fresh weight)/100                                                                 |
|                                               | g NH <sub>3</sub> -N (kg TAN) <sup>-1</sup>      | × initial TAN content (g/kg fresh manure)/initial TN content (g/kg fresh manure)/10                                |
|                                               | g N (kg TN) <sup>-1</sup>                        | /10                                                                                                                |
| N <sub>2</sub> O-N emissions, % of initial TN | g (kg raw manure) <sup>-1</sup>                  | × 10 × 28/44/TC (% of fresh weight)                                                                                |
|                                               | g N <sub>2</sub> O-N (kg TN) <sup>-1</sup>       | /10                                                                                                                |
| CH <sub>4</sub> -C emissions, % of initial TC | g (kg raw manure) <sup>-1</sup>                  | × 10 × 12/16/TC (% of fresh weight)                                                                                |
|                                               | g CH <sub>4</sub> -C (kg TC) <sup>-1</sup>       | /10                                                                                                                |
|                                               |                                                  | × 12 × initial VS content (% of dry matter) × initial TS content (% of fresh manure)/16/TC (g/kg fresh manure)/100 |
|                                               | g CH <sub>4</sub> (kg VS) <sup>-1</sup>          |                                                                                                                    |

<sup>1</sup> NH<sub>3</sub>-N: ammonia-nitrogen; N<sub>2</sub>O-N: nitrous oxide-nitrogen; CH<sub>4</sub>-C: methane-carbon; TN: total nitrogen; TC: total carbon. <sup>2</sup> TAN: total ammonium nitrogen; VS: volatile solids. <sup>3</sup> TS: total solids.

**Table S2.** Pearson correlation coefficients among explanatory variables of NH<sub>3</sub>-N losses from dairy slurry storage (number of measurements = 34).

| Variables <sup>1</sup> | LOS   | T     | pH   | TS   | TN |
|------------------------|-------|-------|------|------|----|
| LOS                    | 1     |       |      |      |    |
| T                      | 0.49  | 1     |      |      |    |
| pH                     | 0.28  | -0.13 | 1    |      |    |
| TS                     | 0.09  | 0.29  | 0.46 | 1    |    |
| TN                     | -0.04 | 0.02  | 0.67 | 0.78 | 1  |

<sup>1</sup> LOS: length of storage; T: ambient temperature; TS: total solids; TN: total nitrogen.

**Table S3.** Pearson correlation coefficients among explanatory variables of N<sub>2</sub>O–N losses from dairy slurry storage (number of measurements = 24).

| Variables <sup>1</sup> | LOS  | T    | pH   | TS   | TN   | TC   |
|------------------------|------|------|------|------|------|------|
| LOS                    | 1.00 |      |      |      |      |      |
| T                      | 0.49 | 1.00 |      |      |      |      |
| pH                     | 0.04 | 0.41 | 1.00 |      |      |      |
| TS                     | 0.08 | 0.60 | 0.46 | 1.00 |      |      |
| TN                     | 0.00 | 0.61 | 0.66 | 0.84 | 1.00 |      |
| TC                     | 0.07 | 0.59 | 0.39 | 0.99 | 0.81 | 1.00 |

<sup>1</sup> LOS: length of storage; T: ambient temperature; TS: total solids; TN: total nitrogen; TC: total carbon.

**Table S4.** Pearson correlation coefficients among explanatory variables of CH<sub>4</sub>–C losses from dairy slurry storage (number of measurements = 24).

| Variables <sup>1</sup> | LOS   | T    | pH   | TS   | TC   |
|------------------------|-------|------|------|------|------|
| LOS                    | 1.00  |      |      |      |      |
| T                      | 0.09  | 1.00 |      |      |      |
| pH                     | -0.01 | 0.45 | 1.00 |      |      |
| TS                     | 0.03  | 0.55 | 0.51 | 1.00 |      |
| TC                     | -0.04 | 0.56 | 0.45 | 0.99 | 1.00 |

<sup>1</sup> LOS: length of storage; T: ambient temperature; TS: total solids; TC: total carbon.

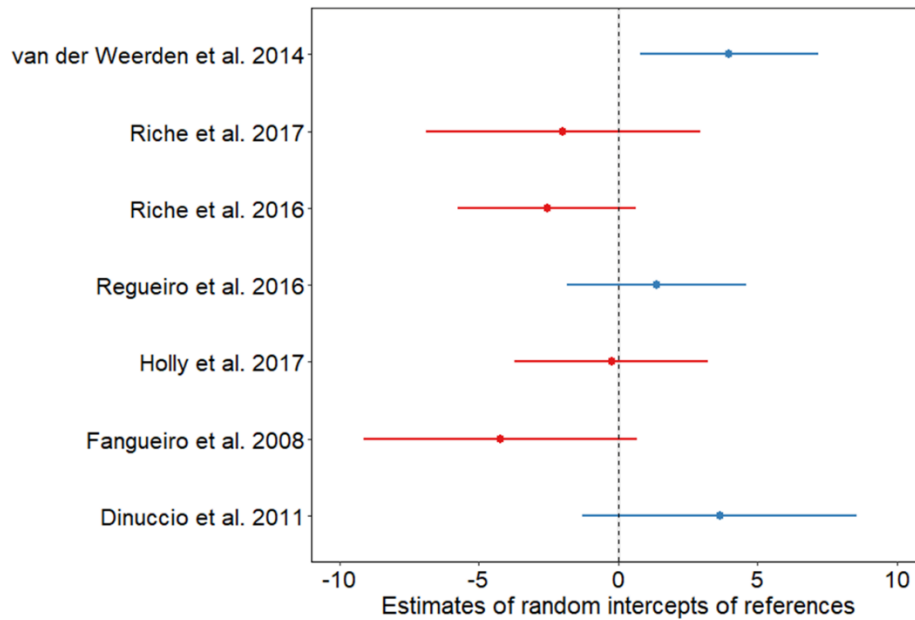

**Figure S1.** Estimates of random intercepts of linear mixed effects model: lmer (NH<sub>3</sub>–N ~ pH + TS + T + LOS + (1 | Reference)).
